# Supplementary material for: Upconversion nanoparticle-assisted cationic and radical/cationic hybrid photopolymerization using sulfonium salts
Source: Royal Society of Chemistry journal article supplement (doi:10.1039/d1py01455b), 2021-01-01
Supplement: d1py01455b1.pdf [file d1py01455b1.pdf]

Supporting Information for

# **Upconversion nanoparticle-assisted cationic and radical/cationic hybrid photopolymerization using sulfonium salts**

*Xiaoyan Meng,<sup>a</sup> Longji Li,<sup>b</sup> Yaoxin Huang,<sup>b</sup> Xin Deng,<sup>a</sup>  
Xiaoxuan Liu<sup>b</sup>, Zhiquan Li<sup>\*b</sup>*

<sup>a</sup>School of Electromechanical Engineering, Guangdong University of Technology, 510006, Guangzhou, Guangdong, China

<sup>b</sup>School of Materials and Energy, Guangdong University of Technology, 510006 Guangzhou, Guangdong, China. E-mail: lzq@gdut.edu.cn

*e-mail: lzq@gdut.edu.cn*

***1. Experimental Section***

***2. Figures***

***3. References***

## 1. Experimental Section

### Materials

Lanthanide-doped UCNP  $\beta$ -NaYF<sub>4</sub>:18%Yb, 0.5%Tm nanoparticles were purchased from Shanghai Keyan Phosphor Technology Co., Ltd. Sulfonium salts GR55 and GR61 were provided by Hubei Gurun Technology Co., Ltd as gifts. 1,2-Epoxy cyclohexane (CHO, 98%), 9-vinylcarbazole (NVC, 98%), n-butyl vinyl ether (BVE, 98%), benzyltriethylammonium chloride (TEBAC) and all the other reagents were purchased from Adamas (China) Co., Ltd. CHO and BVE was purified by the neutral alumina column and other reagents was used without any further purification. Trimethylolpropane triacrylate (TMPTA) and 3,4-epoxycyclohexylmethyl-3',4'-epoxycyclohexane carboxylate (TTA21) were provided by Jiangsu Kailin Ruiyang Chemical Co., Ltd and Jiangsu Tetra New Material Technology Co., Ltd, respectively. The conjugated sulfonium salt CSS was synthesized according to the literature<sup>1</sup>. Chemical structures of the monomers were shown in Figure S1

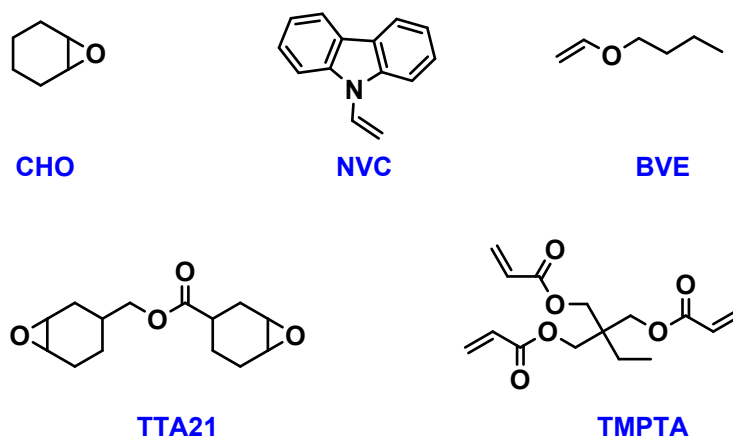

Figure S1. Chemical structures of the monomers

### Characterization:

UV-Vis absorption spectra of sulfonium salts were taken in acetonitrile by a spectrophotometer UV-3600 Plus (SHIMADZU), while the emission spectrum of UCNP was measured in hexane by CARY Eclipse series fluorescence spectrophotometer. The conversions of the cationic photopolymerization using different cationic photoinitiators and monomers under different irradiation conditions were measured using a gravimetric method. The conversions of vinyl and epoxy groups in the hybrid photopolymerization at different depths were measured using an ATR Fourier-transform infrared (ATR-FTIR) spectroscopy (Thermal Fisher Nicolet iS10 series). The thermal stability of the samples obtained under different irradiation conditions was investigated by thermogravimetric analysis (TGA1100SF, Mettler Toledo International Trading Co. Ltd., Switzerland). The samples were heated from 30 to 600 °C under a continuous N<sub>2</sub> flow of 50 mL/min and with a heating rate of 10 °C/min.

### Preparation and photocuring of the photopolymerizable samples

General procedure for cationic photopolymerization: The sulfonium salt GR55 ( $2 \times 10^{-2}$

mmol) and UCNPs (1 wt.%) were dispersed in 1 mL of dry CH<sub>2</sub>Cl<sub>2</sub> in the Schlenk tube. With stirring, 1 mL 1, 2-epoxycyclohexane (CHO) was added into the mixed solution. Before the irradiation, the solution was degassed by purging dry nitrogen and the whole photopolymerizations were carried out under the nitrogen atmosphere. After a certain irradiation time of 980 nm NIR laser with a light intensity of 11.6 W (the shape of the laser spot is a circle with a 7 mm diameter), the polymer was then precipitated in methanol (20 mL) before removing the UCNPs via centrifugation. After that, the polymer was separated from the mixture after 3 times centrifugation and dried in vacuum for more than 24h and then weighed. All other polymerizations were performed under the same conditions. The conversion is calculated using the following formula:

$$\text{Conversion (\%)} = \frac{W_t}{W_0} \times 100\%$$

Where  $W_t$  is the weight of the dried sample, and  $W_0$  is the weight of the two monomers before irradiation.

General procedure for hybrid photopolymerization: The photocurable formulations were prepared by mixing UCNPS (0.4 wt%) with 0.3 wt% of photoinitiator sulfonium salt GR55 and trimethylolpropane triacrylate (TMPTA) / 3,4-epoxycyclohexylmethyl-3',4'-epoxycyclohexane carboxylate (TTA21) (1:1 wt%). The mixture was stirred for 30 min. The photoinitiator was completely dissolved and the UCNPS were evenly distributed in the formulation. Then the photocurable samples were injected into a glass tube (17.78 cm long with an outer radius of 5 mm and an inner radius of 4 mm), and then the glass tube was vertically exposed to a fiber coupled laser system (980 nm, Changchun New Industries Optoelectronics Technology). The output power was adjusted to 12 W for the activation of the UCNPS. The cured samples obtained with different irradiating time were transferred out of the tube.

The conversions of vinyl and epoxy groups in the hybrid photopolymerization at different depths were measured using an ATR-FTIR (500-4000 cm<sup>-1</sup> wavelength range, resolution 8 cm, 6 scans per sample). The vinyl and epoxy conversion were determined from the ratio of the absorbance intensities of C=C (for acrylate, peak at 1634 cm<sup>-1</sup>) and C-O (for epoxy, peak at 810 cm<sup>-1</sup>) to that of C=O as the reference (peak at 1717 cm<sup>-1</sup>) before and after curing with the following formula:

$$\text{Conversion (\%)} = 1 - \frac{A_t/A_{ra}}{A_0/A_{rb}} \times 100\%$$

Where  $A_0$ , and  $A_t$  denote the absorbance intensities of C=C for acrylate (or C-O for epoxy) before and after curing, while  $A_{rb}$  and  $A_{ra}$  represent the absorbance intensities of C=O before and after curing, respective.

## 2. Figures

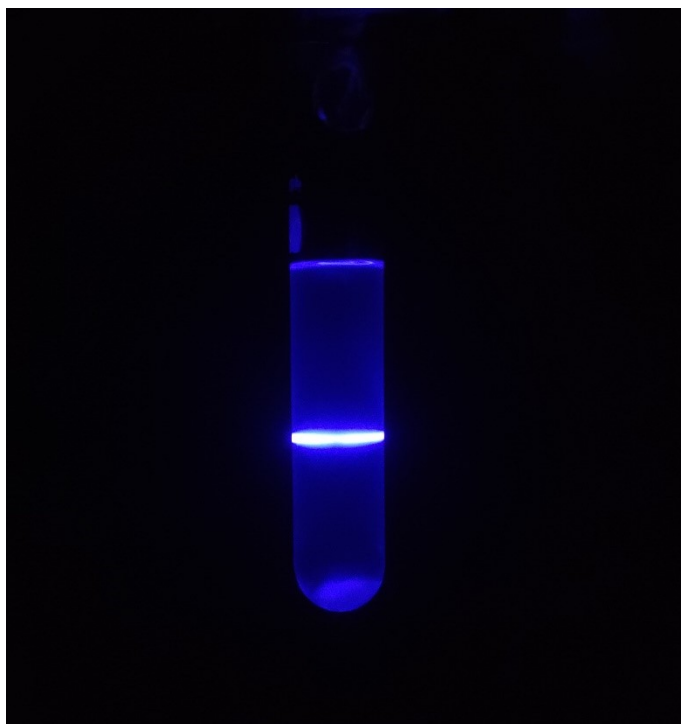

**Fig S2.** Blue fluorescence emitted from UCNPs under 980 nm NIR irradiation

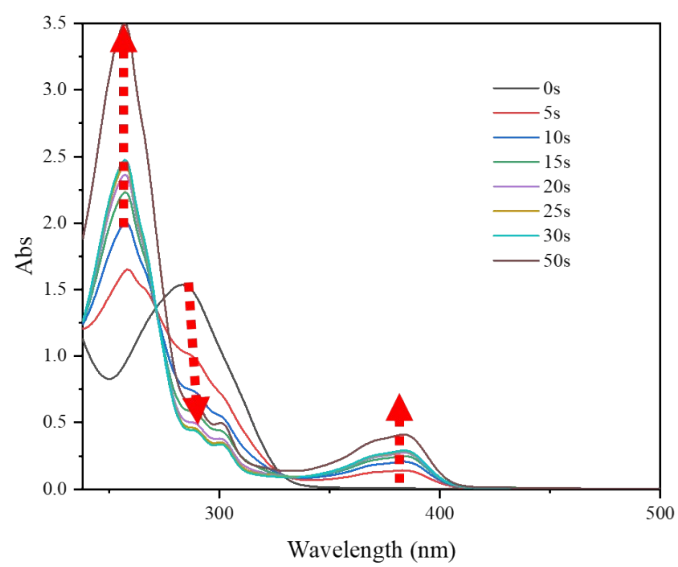

**Fig S3.** Photolysis of GR55 under 365 nm LED irradiation

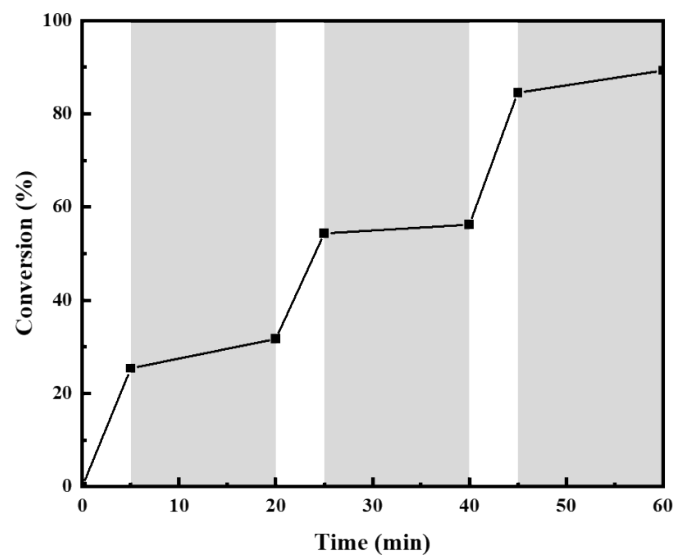

**Fig S4.** The conversion of epoxy group of CHO during the polymerization using GR55 as an initiator in a turn on–off approach

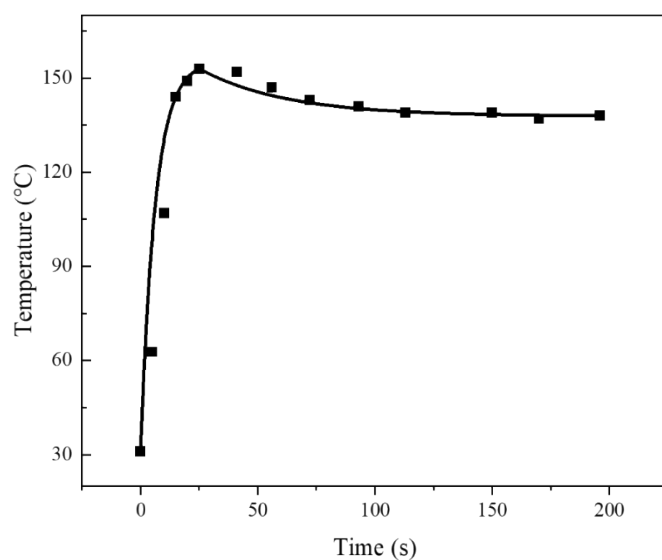

**Fig S5.** Temperature profiles of the hybrid sample under 980 nm NIR irradiation with different irradiation time.

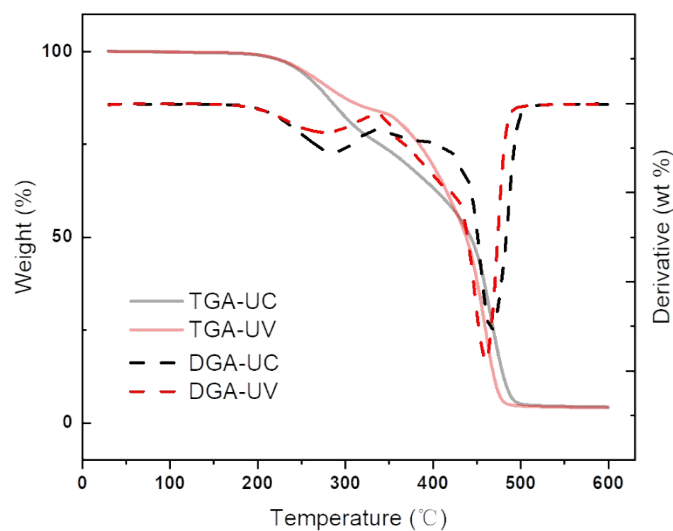

**Fig S6.** TGA and DTG curves of cured samples obtained under UCNP illuminance and 365 nm LED irradiation

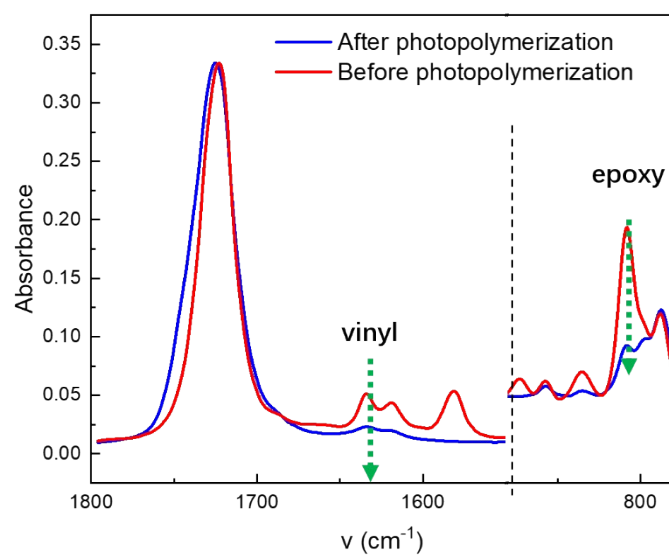

**Fig S7.** The FT-IR spectra with targeting bands before and after UCNPs-assisted photopolymerization

### **3. Reference**

1. Jin, M.; Wu, X.; Malval, J. P.; Wan, D.; Pu, H. *Journal of Polymer Science Part A: Polymer Chemistry* 2016, 54, 2722-2730.
